# Supplementary material
Source: publisher figshare collection journal article supplement (https://acs.figshare.com/ndownloader/files/3734911)

## SUPPORTING INFORMATION

### Factors and atomistic parameters in the PACSAB force field equations

The multiplicative factor  $C$  of the implicit solvation term in equation 7 is  $C=1/(2\pi^{(3/2)}\lambda)$ , where we have chosen the correlation length  $\lambda = 3.5$  Å [24]. The solvation free energies  $\Delta G_i$  of each atom are taken from the  $\Delta G_{\text{free}}$  column of Table I of [24], and the volumes  $v_i$  are taken from the “Volume” column of the same table. Regarding the atomistic van der Waals term (first equation of Appendix B),  $\epsilon^*$  is taken from the Table IV of [23], and  $R^*$  is the  $r_{\text{min}}$  of the same table.

**Table S1.** PACSAB simulation speed (time simulated/CPU core time) for different systems

| System                                             | Number of particles | Speed (ns/h) |
|----------------------------------------------------|---------------------|--------------|
| 4 A $\beta$ 40 peptides<br>(A $\beta$ 40 solution) | 1152                | 5.5          |
| $\alpha$ -synuclein                                | 967                 | 4.8          |
| 1FVQ protein                                       | 513                 | 24           |
| 1PPE complex                                       | 1781                | 3.1          |

**Table S2.** Average RMSDs at the end of the simulations for several proteins used in the test sets of PaLaCe [5], PRIMO [7] and OPEP[12]. Our PACSAB simulations are 100 ns long for all the proteins.

| PDB  | RMSD (A) with PACSAB | CG model in the original work, length of the trajectory | RMSD (A) with the CG model of the original work |
|------|----------------------|---------------------------------------------------------|-------------------------------------------------|
| 1TZV | 5                    | PaLaCe, 100 ns                                          | 4.5                                             |
| 1MLC | 3.4                  | PaLaCe, 100 ns                                          | 3                                               |
| 1TMY | 5.5                  | PaLaCe, 100 ns                                          | 4.5                                             |
| 3GB1 | 4.2                  | PRIMO, 50 ns                                            | 2.6                                             |
| 1D3Z | 4.4                  | PRIMO, 50 ns                                            | 3.3                                             |
| 1BTA | 5                    | PRIMO, 50 ns                                            | 2.6                                             |
| 1FKS | 4.5                  | PRIMO, 50 ns                                            | 3.0                                             |
| 1A2P | 5.9                  | PRIMO, 50 ns                                            | 3.9                                             |
| 2AAS | 6.2                  | PRIMO, 50 ns                                            | 4.4                                             |
| 1GYZ | 6.1                  | OPEP, 30 ns                                             | 4.2                                             |
| 1FAF | 5.8                  | OPEP, 30 ns                                             | 4.2                                             |
| 1FCL | 4.2                  | OPEP, 30 ns                                             | 3                                               |
| 1B75 | 4.8                  | OPEP, 30 ns                                             | 5.3                                             |
| 2B86 | 3.5                  | OPEP, 30 ns                                             | 4.5                                             |
| 1AFP | 5.1                  | OPEP, 30 ns                                             | 3.6                                             |

**Table S3.** Complexes of the test set. From left to right, experimental binding energies, number of residues of the receptor, number of residues of the ligand, RMSD respect to initial structure after a 1ns DMD trajectory when starting from the experimental complex structure, and the same when starting from the best scored false positive (see main text).

| COMPLEX | $\Delta G$<br>(kcal/mol) | N <sub>res</sub><br>(receptor) | N <sub>res</sub> (ligand) | RMSD <sub>exp</sub> (Å) | RMSD <sub>fp</sub> (Å) |
|---------|--------------------------|--------------------------------|---------------------------|-------------------------|------------------------|
| 1AY7    | -13.2                    | 96                             | 89                        | 5.6                     | 17.6                   |
| 1BUH    | -10.1                    | 287                            | 70                        | 33.4                    | 10.1                   |
| 1BVN    | -10.5                    | 496                            | 71                        | 6.5                     | 41.3                   |
| 1E6J    | -10.3                    | 218                            | 209                       | 13.2                    | 30.6                   |
| 1FSK    | -13.1                    | 220                            | 159                       | 14.9                    | 34.1                   |
| 1GPW    | -11.3                    | 253                            | 200                       | 5.4                     | 37.2                   |
| 1IQD    | -15                      | 200                            | 155                       | 7.8                     | 30.9                   |
| 1M10    | -11.2                    | 199                            | 267                       | 8.7                     | 37.4                   |
| 1MAH    | -14.5                    | 533                            | 61                        | 5.5                     | 8.6                    |
| 1OPH    | -11.3                    | 375                            | 223                       | 7.8                     | 16.9                   |
| 1PPE    | -15.6                    | 223                            | 29                        | 4.0                     | 14.3                   |
| 1R0R    | -14.2                    | 274                            | 51                        | 3.9                     | 6.4                    |
| 2B42    | -12.1                    | 364                            | 184                       | 6.6                     | 13.8                   |
| 2HLE    | -10.1                    | 188                            | 133                       | 6.2                     | 29.9                   |
| 2HQS    | -10.2                    | 412                            | 108                       | 55.0                    | 24.9                   |
| 2HRK    | -11.0                    | 177                            | 105                       | 14.5                    | 45.0                   |
| 2I25    | -12.3                    | 114                            | 129                       | 7.0                     | 32.5                   |
| 2JEL    | -11.6                    | 218                            | 85                        | 34.8                    | 38.0                   |
| 2SIC    | -13.8                    | 275                            | 107                       | 6.0                     | 44.3                   |
| 2SNI    | -16.0                    | 275                            | 64                        | 3.7                     | 6.2                    |

**Figure S1.** DSSP plot for secondary structure transitions in the PACSAB trajectory of a A $\beta$ 40 peptide. The simulation started from a completely extended random coil conformation.

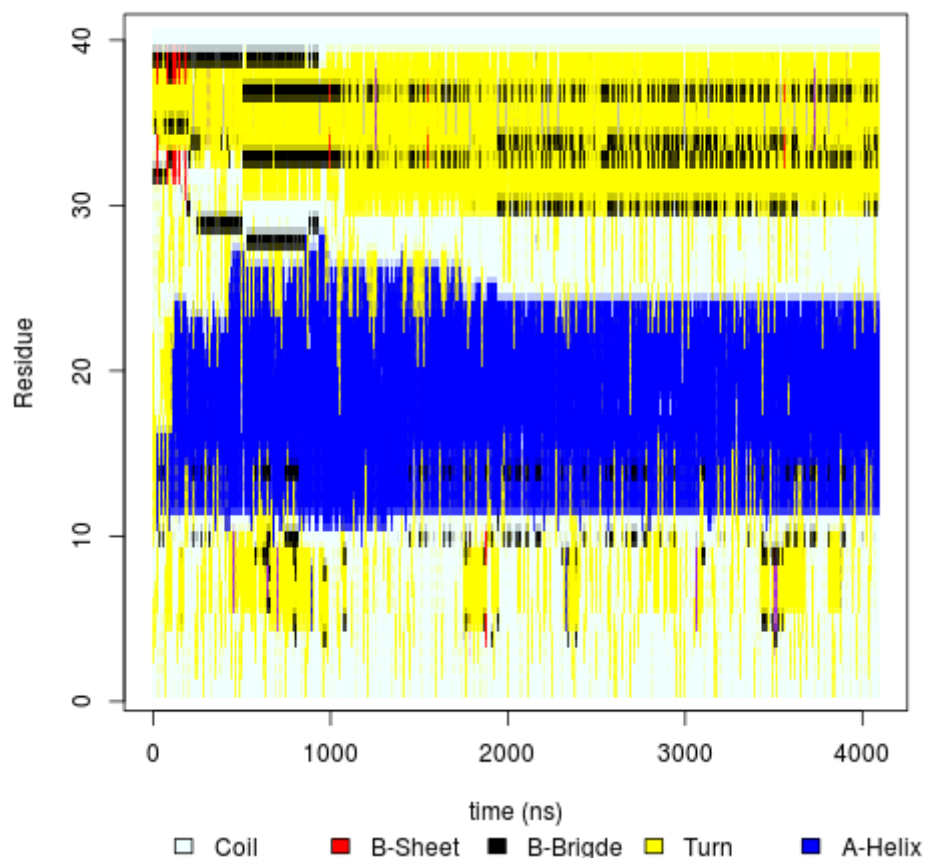

**Figure S2.** Secondary structure probabilities obtained with PACSAB for the A $\beta$ 40 peptide along sequence. Solid lines correspond to the simulation of a single A $\beta$ 40 peptide, and dashed lines to the simulation of the A $\beta$ 40 solution, where oligomers are formed.  $\alpha$ -helix probability in black and  $\beta$ -strand probability in red.

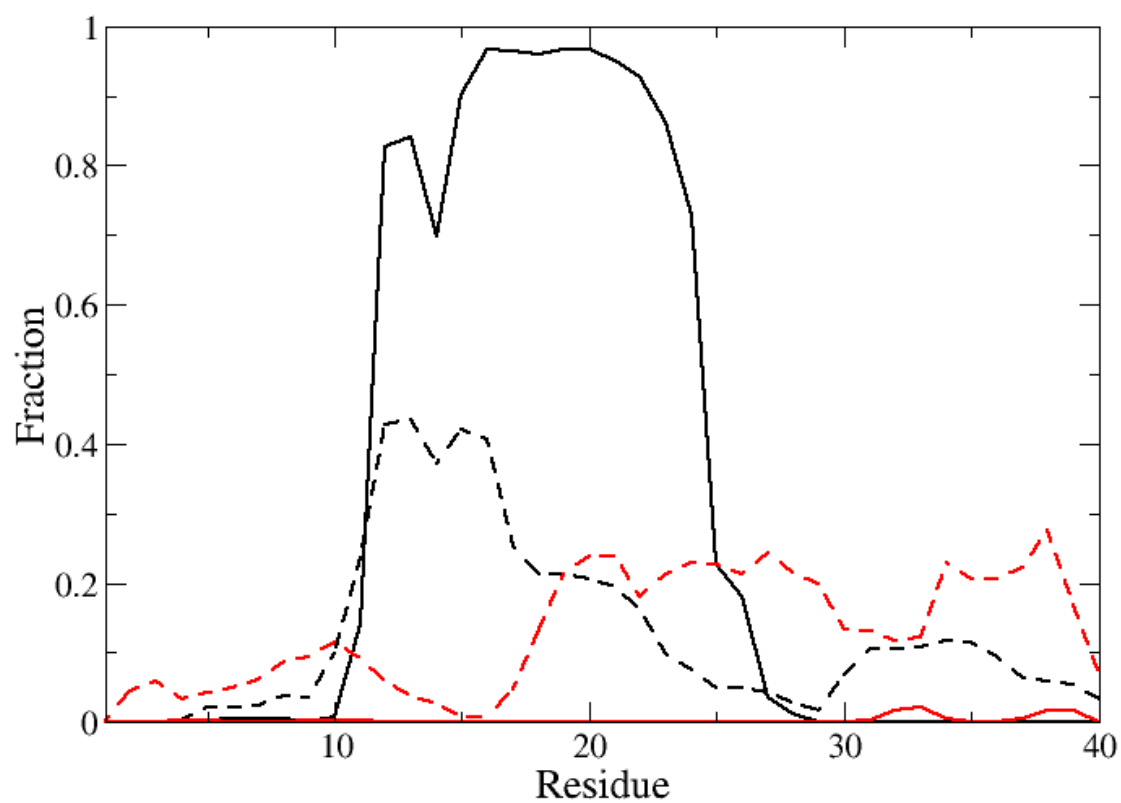

**Figure S3.** Intermolecular contact maps in A $\beta$ 40 dimers. Blue corresponds to zero contacts, red to many contacts.

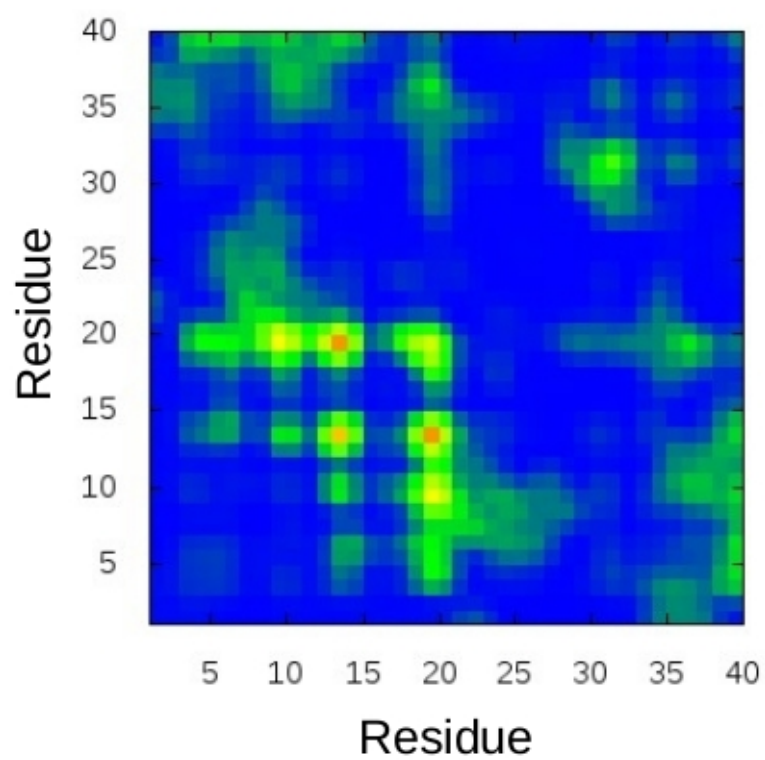

**Figure S4.** Intramolecular contact maps for an isolated A $\beta$ 40 peptide (left) and A $\beta$ 40 dimers (right). Blue corresponds to zero contacts, red to many contacts.

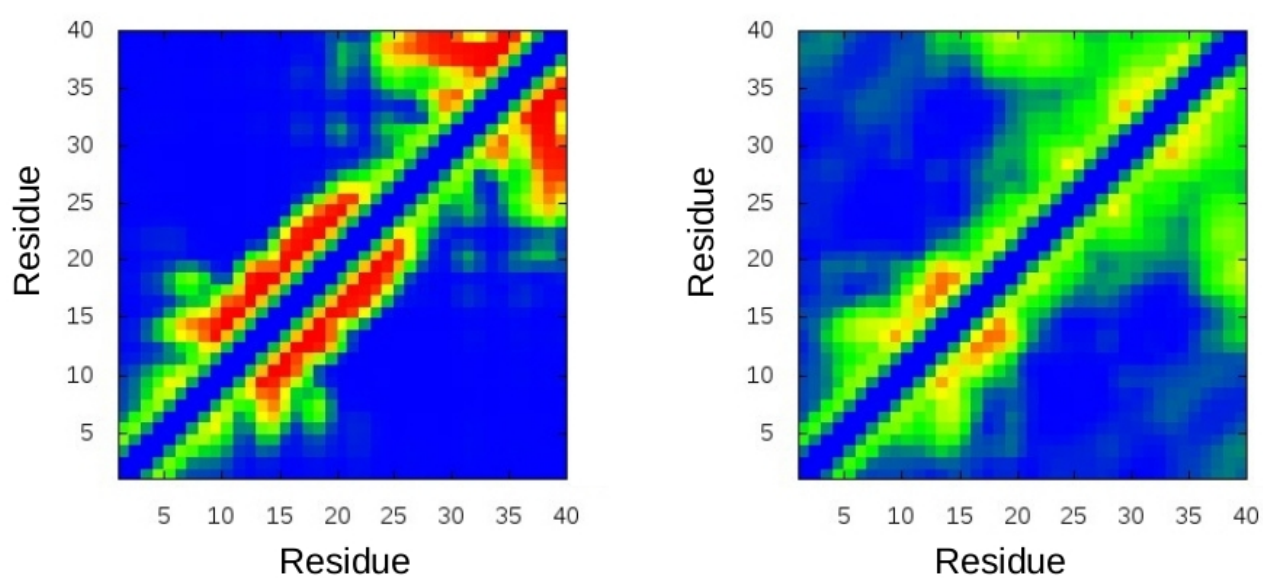

**Figure S5.** Folding of a three strand  $\beta$ -sheet (top) and of the  $\alpha$ -helix EK peptide (below). At left, the superposition of the structure at the end of the simulation (cyan) and the experimental structure (orange). At right, the RMSD respect to the native conformation along the simulation. The  $\beta$ -sheet is the Gly5-Trp29 segment of the protein 1I6C. The sequence of the EK peptide is AEAAKAAEAAKA.

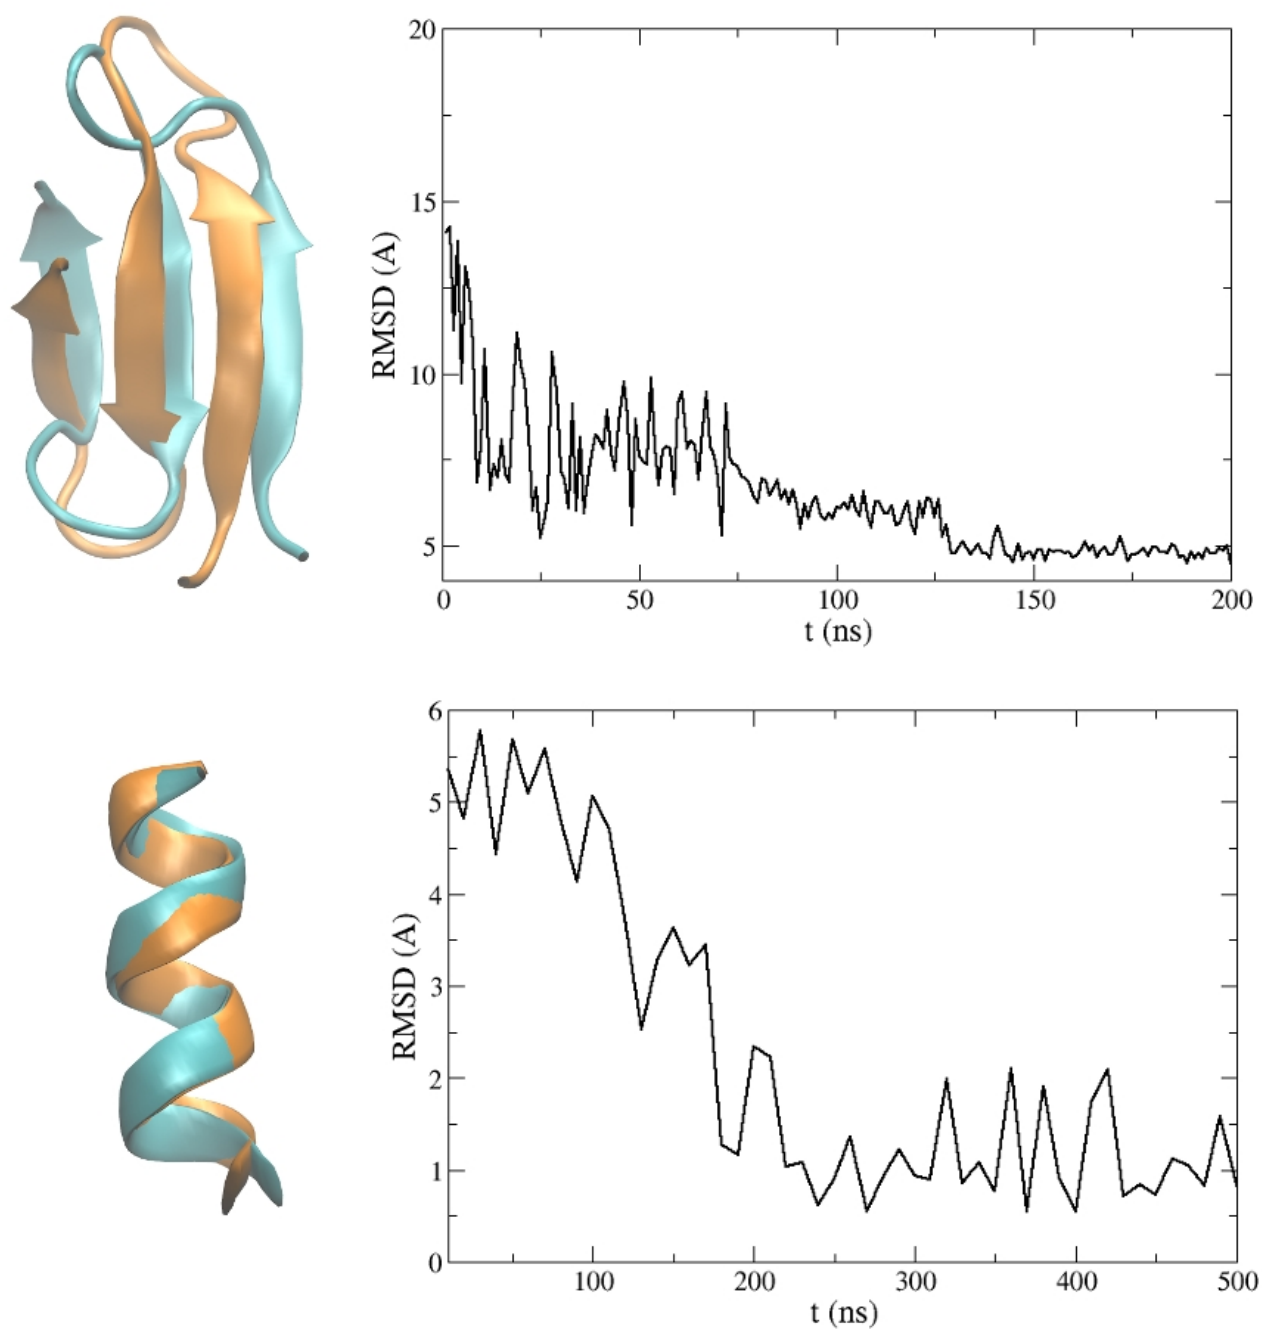



**Figure S6.** Ramachandran plot of the protein benchmark that we have used. Crystal structures (left) and structures after 500 ns of simulation with PACSAB (right)

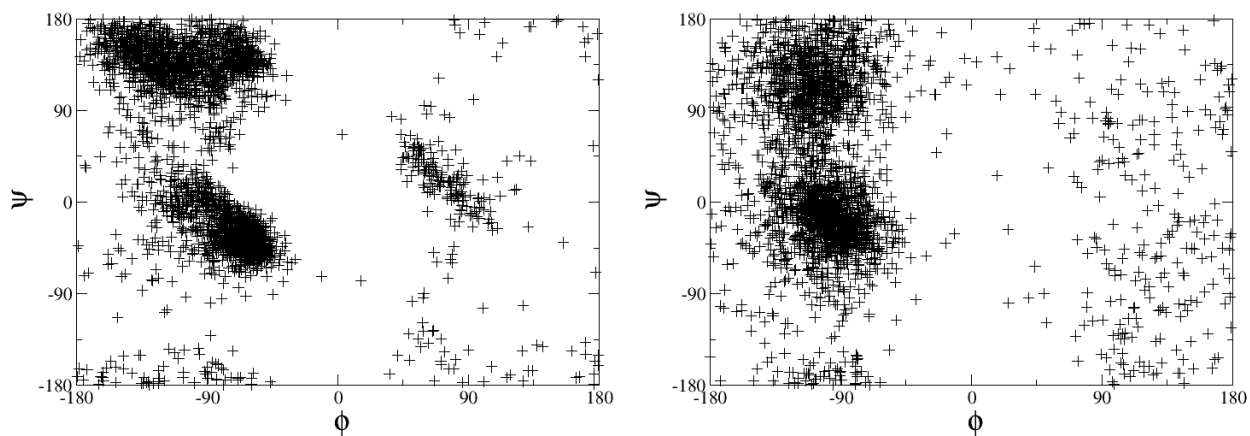

**Figure S7.** Contact maps of the proteins in the benchmark. Blue corresponds to zero contacts, red to many contacts. Above the diagonal, contact map of the crystal; below the diagonal, average of the contacts over the last 100 ns of trajectory

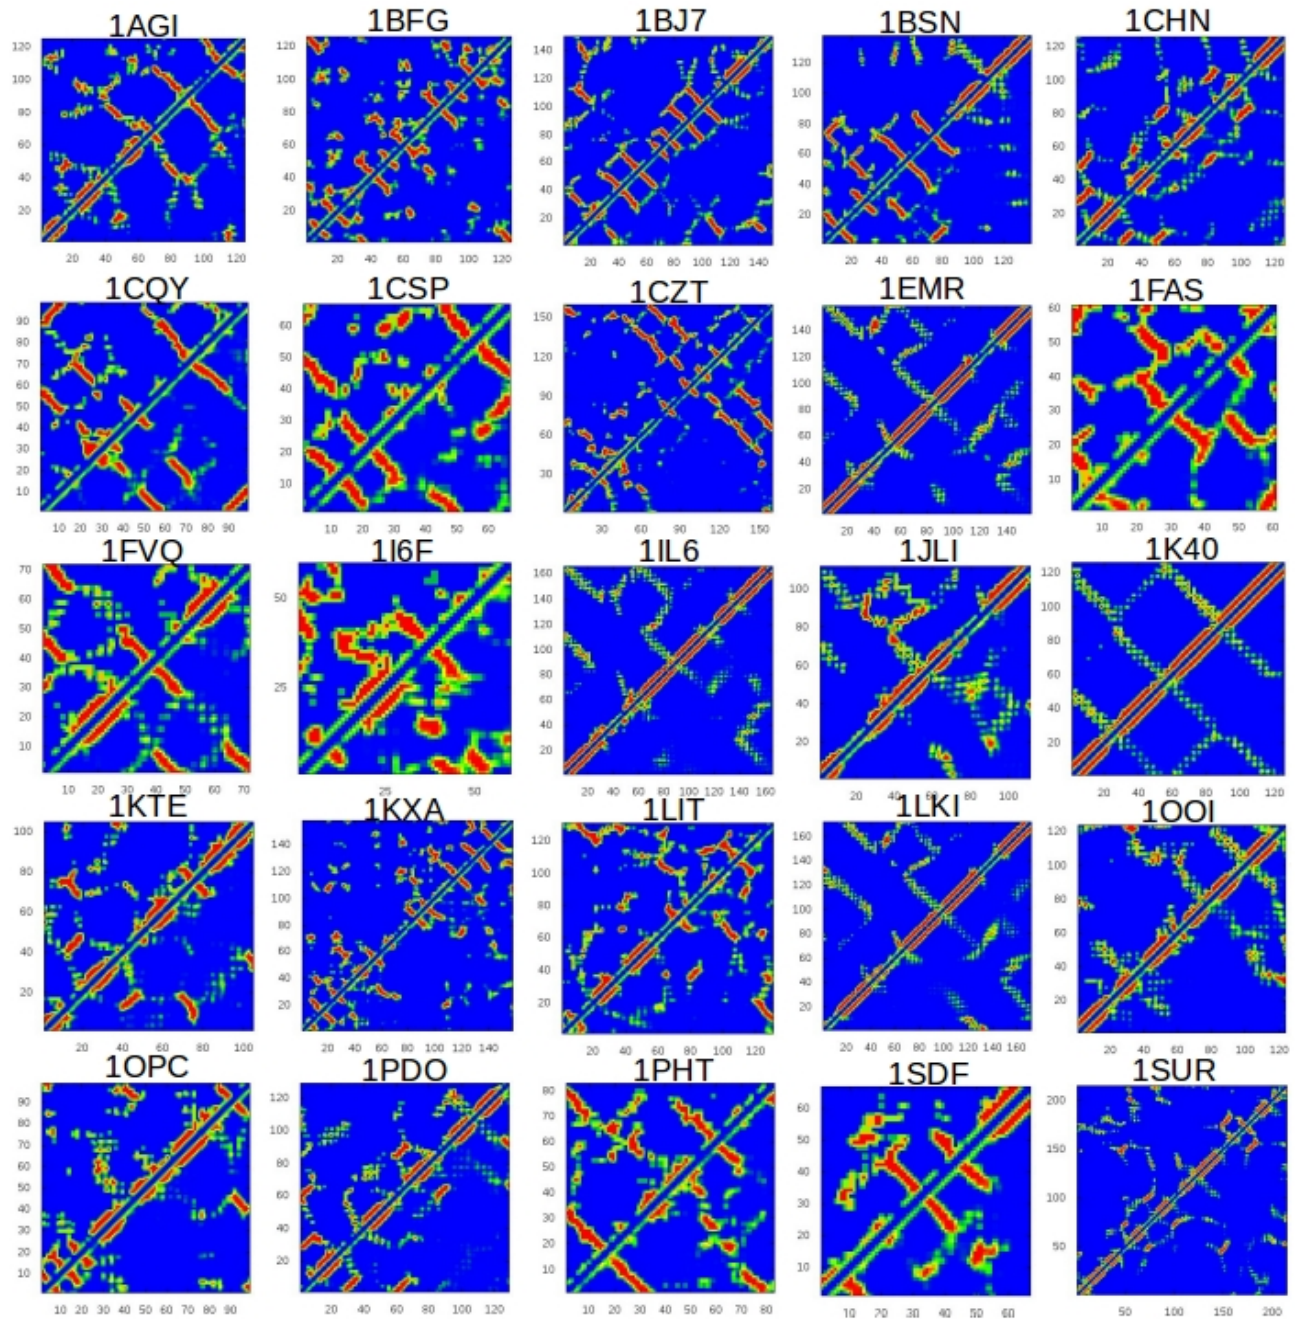

**Figure S8.** Structure of several proteins of the benchmark after 500 ns of simulation with PACSAB (cyan) compared to crystal structure (orange). Same ordering as in the contact maps figure.

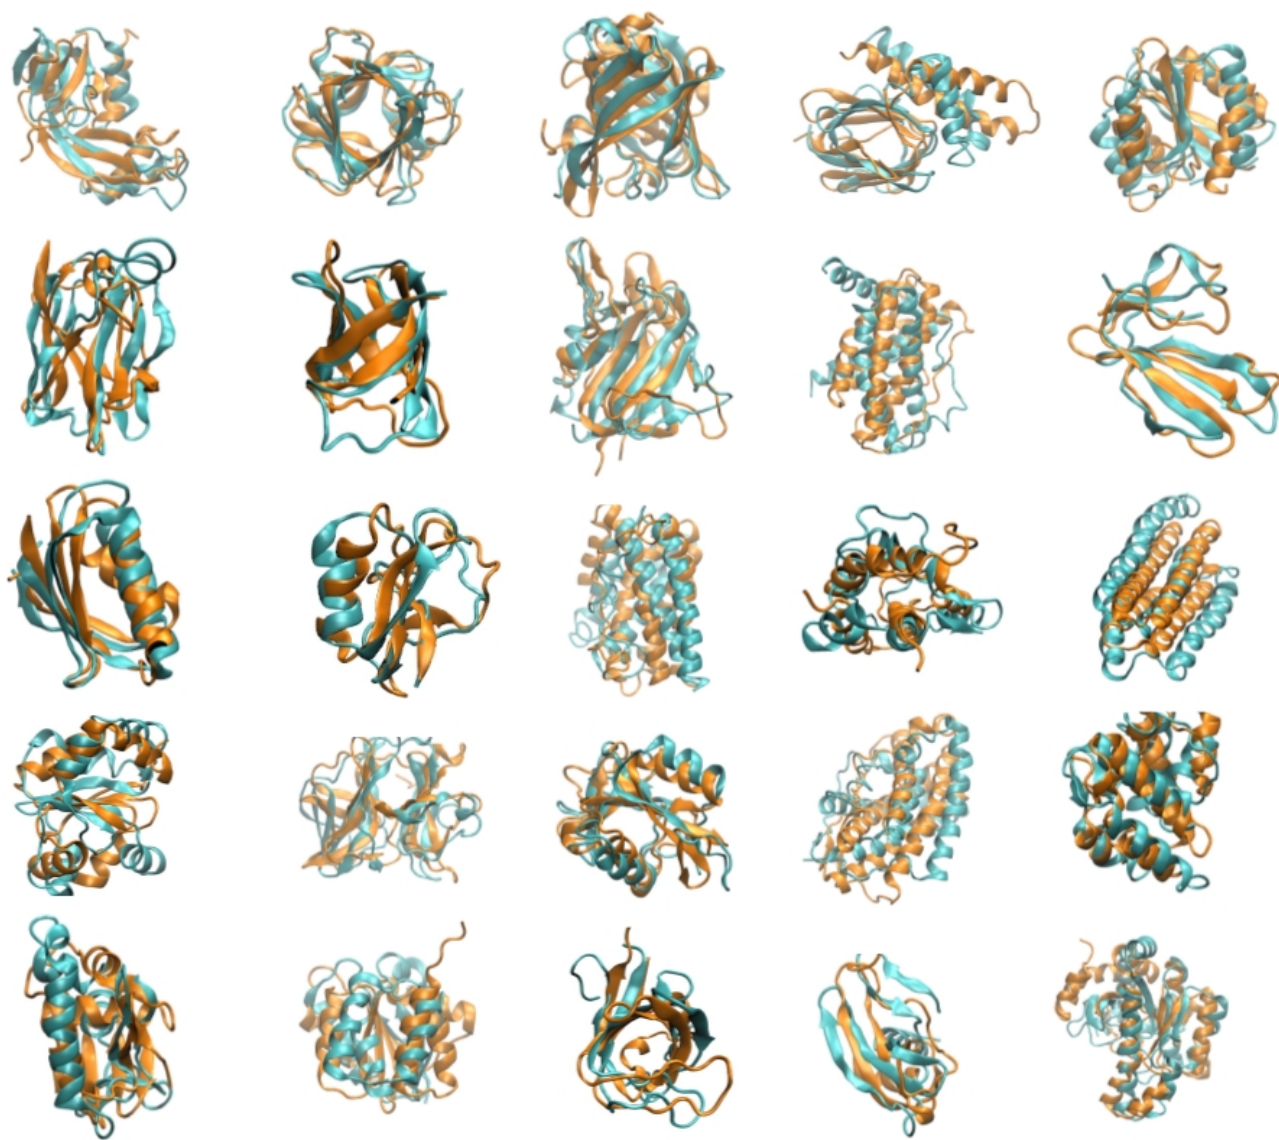

Supplement: Supplementary file 1 [file 3734911]
